# Supplementary material
Source: MDPI journal article supplement (https://www.mdpi.com/2072-4292/9/1/85)

# Supplementary Materials: Remote Sensing-Based Assessment of the 2005–2011 Bamboo Reproductive Event in the Arakan Mountain Range and Its Relation with Wildfires

Francesco Fava and Roberto Colombo

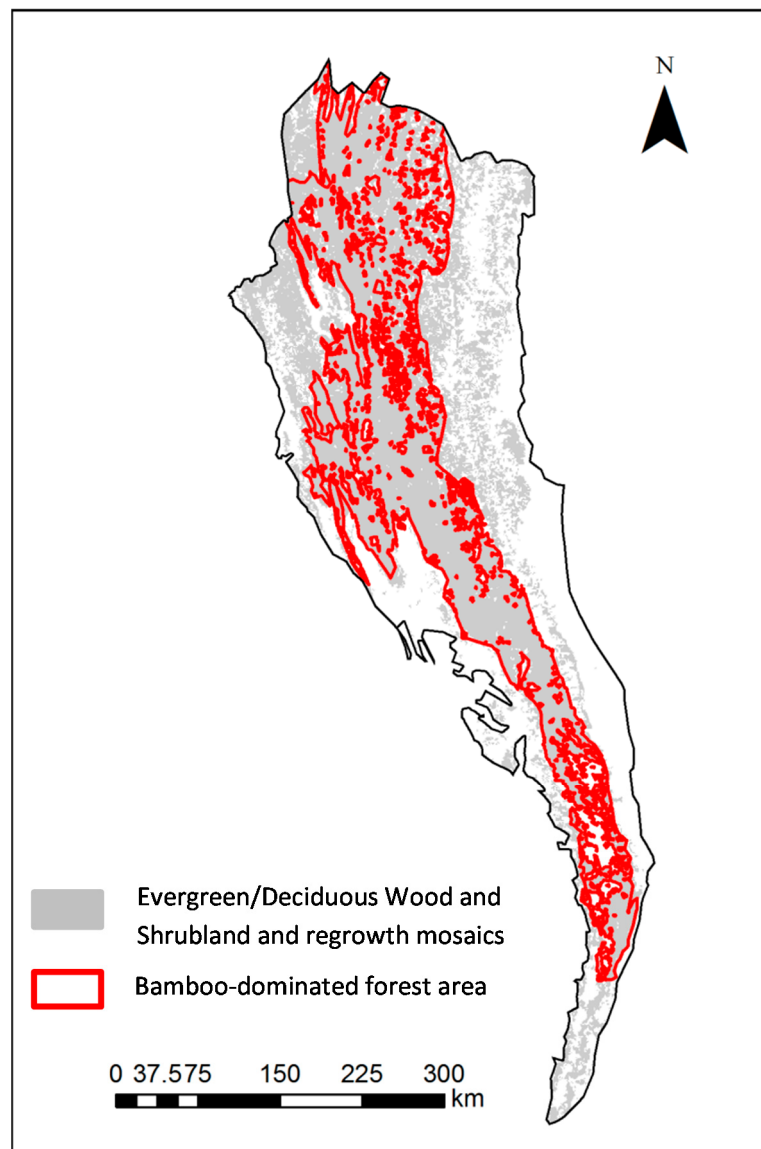

**Figure S1.** The map depicts the ‘evergreen/deciduous wood and shrubland and regrowth mosaics’ forest classes of the Forest Map of South East Asia [21,22] and the bamboo-dominated forest area generated in this study by visual interpretation of multiple information layers.

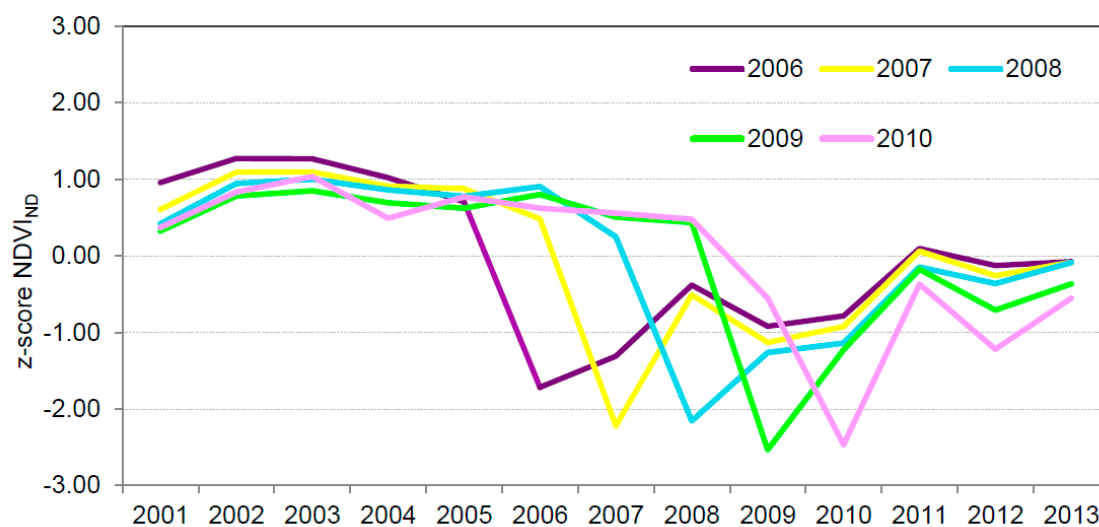

**Figure S2.** Z-score NDVI<sub>IND</sub> trends calculated by spatially averaging NDVI<sub>IND</sub> time series across the five main reproductive event year classes, as depicted in Figure 4. A significant NDVI<sub>IND</sub> anomaly can be observed during the reproductive event years.

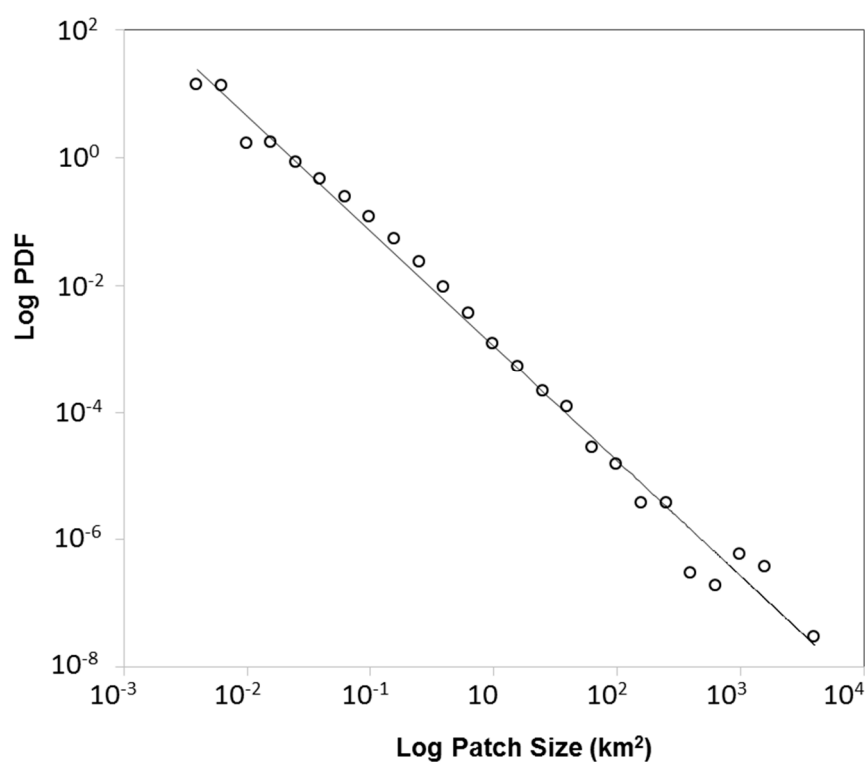

**Figure S3.** Patch-size distribution of reproductive event patches. The log-log plot depicts on the X axis the patch size (km<sup>2</sup>) and on the Y axis the probability density function (PDF). The power-law fitting is reported.

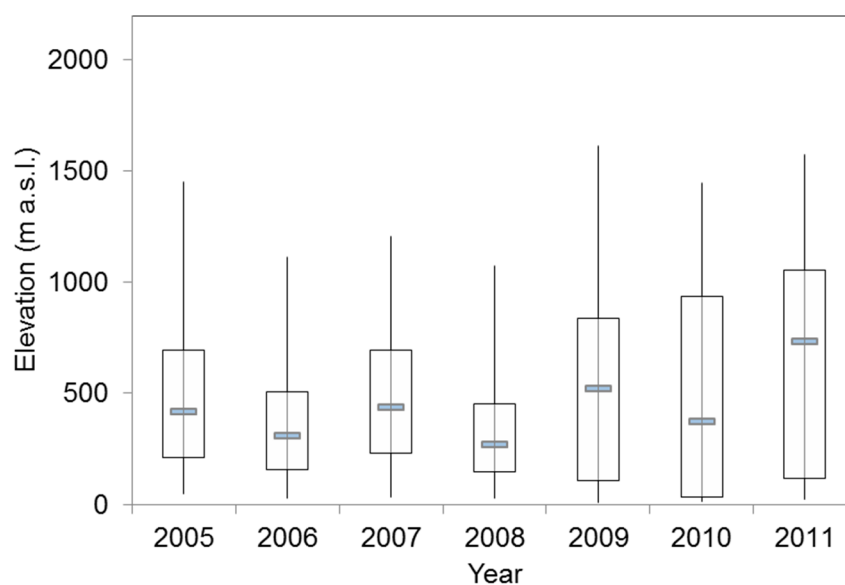

**Figure S4.** Distribution of reproductive event patches with elevation. The box-plot depicts on the X axis the reproductive event year and on the Y axis the elevation.

**Table S1.** Regression analysis between Burned Area and  $SPEI_{NOV\text{MAY}}$  including a binary variable ( $FL_{INFL_0}$ ) with value 1 for reproductive event years and value 0 for non-reproductive event years. The coefficient for  $FL_{INFL_0}$  is positive and highly significant, indicating that the burn area is significantly larger during reproductive event years than non-reproductive event years, conditional on  $SPEI_{NOV\text{MAY}}$ .

| Source                 | SS           | df        | MS           | Number of obs = 12;           |                      |           |
|------------------------|--------------|-----------|--------------|-------------------------------|----------------------|-----------|
| Model                  | 25,363,167.4 | 2         | 12,681,583.7 | F (2,9) = 25.92;              |                      |           |
| Residual               | 4,403,529.3  | 9         | 489,281.033  | Prob > F = 0.0002;            |                      |           |
|                        |              |           |              | R <sup>2</sup> = 0.8521;      |                      |           |
| Total                  | 29,766,696.7 | 11        | 2,706,063.33 | Adj. R <sup>2</sup> = 0.8192; |                      |           |
|                        |              |           |              | RMSE = 699.49                 |                      |           |
| Burned Area            | Coef.        | Std. Err. | t            | P >  t                        | [95% Conf. Interval] |           |
| $SPEI_{NOV\text{MAY}}$ | -2167.365    | 417.1636  | -5.20        | 0.001                         | -3111.055            | -1223.675 |
| $FL_{INFL_0}$          | 2267.419     | 406.8076  | 5.57         | 0.000                         | 1347.156             | 3187.682  |
| _cons                  | 644.9496     | 311.6847  | 2.07         | 0.068                         | -60.1301             | 1350.029  |

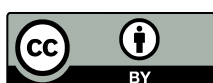

Supplement: s1 [file s1]
